# Supplementary material for: Three-dimensional NiCo2O4/NiCo2S4hybrid nanostructure on Ni-foam as a high-performance supercapacitor electrode
Source: Royal Society of Chemistry journal article supplement (doi:10.1039/c6ra19376e), 2016-01-01
Supplement: c6ra19376e1.pdf [file c6ra19376e1.pdf]

## Supporting Information

# Three-dimensional NiCo<sub>2</sub>O<sub>4</sub>/NiCo<sub>2</sub>S<sub>4</sub> Hybrid Nanostructures on Ni-foam as High-performance Supercapacitor Electrode

Shipra Raj,<sup>1</sup> Suneel Kumar Srivastava,<sup>2</sup> Pradip Kar<sup>1</sup> and Poulomi Roy<sup>1\*</sup>

<sup>1</sup>Department of Chemistry, Birla Institute of Technology Mesra, Ranchi 835215, Jharkhand, India

<sup>2</sup>Department of Chemistry, Indian Institute of Technology Kharagpur, Kharagpur 721302, West Bengal, India

\*Email: poulomiroy@yahoo.com

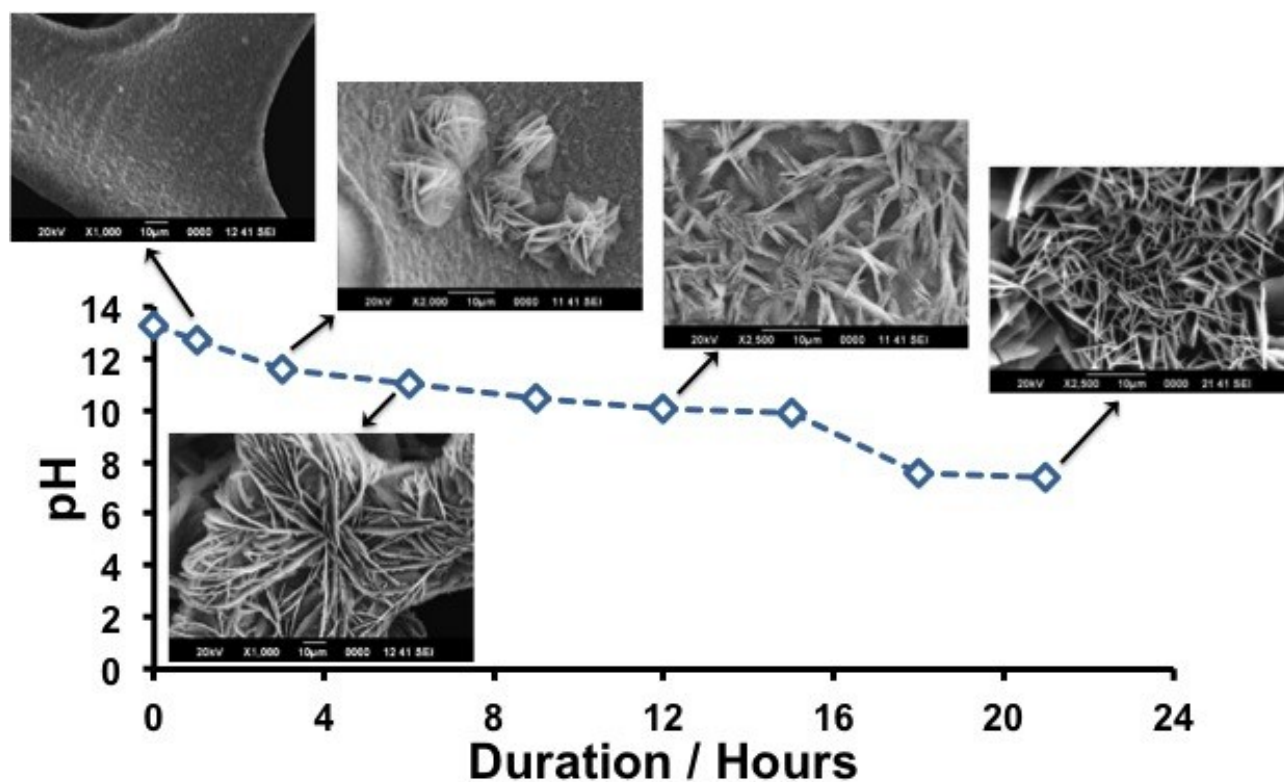

**Figure S1:** Growth process of NiCo-hydroxide precursor deposition on Ni-foam at different reaction durations and different pH.

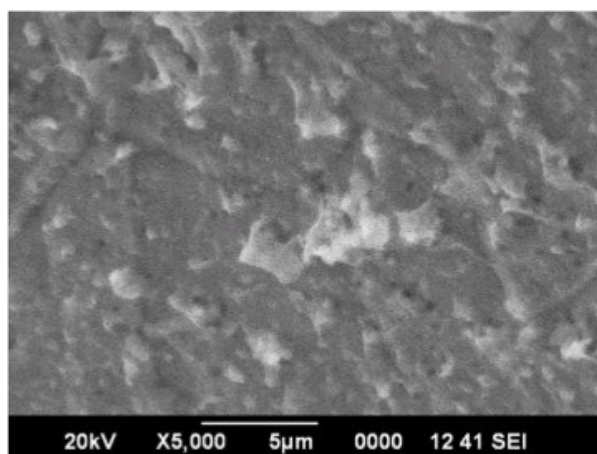

**Figure S2:** Deposition of NiCo-hydroxide precursor on Ni-foam at pH 11 adding few drops of ammonia.

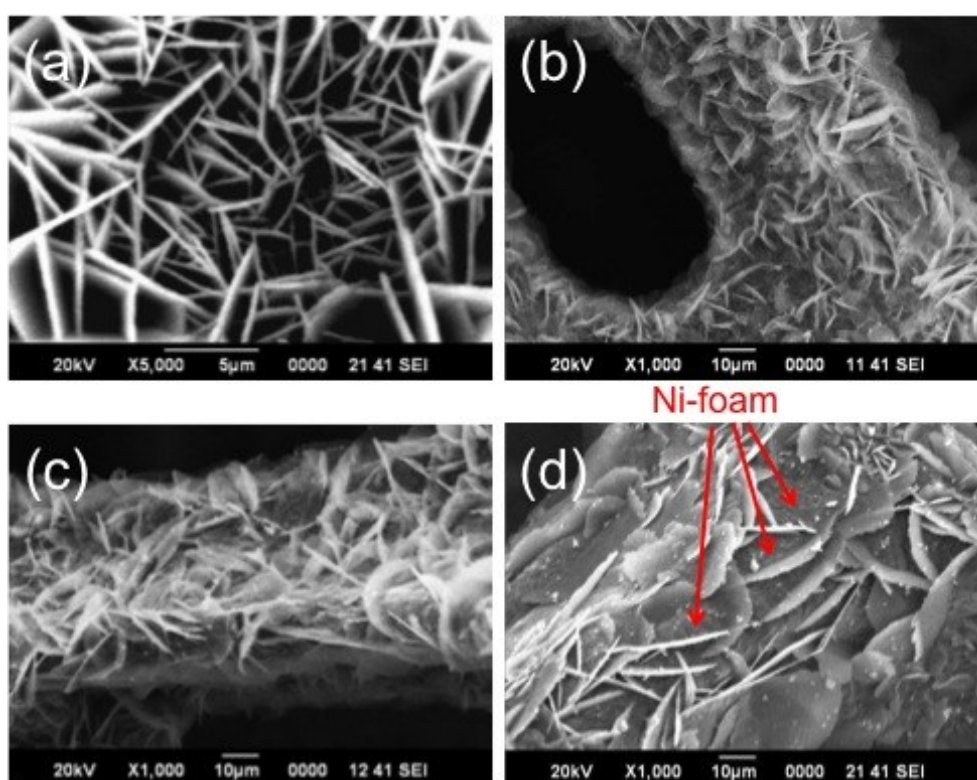

**Figure S3:** NiCo-hydroxide precursor deposition on Ni-foam at different ammonia : water ratios: (a) 50 : 0; (b) 40 : 10; (c) 30 : 20 and (d) 20 : 30.

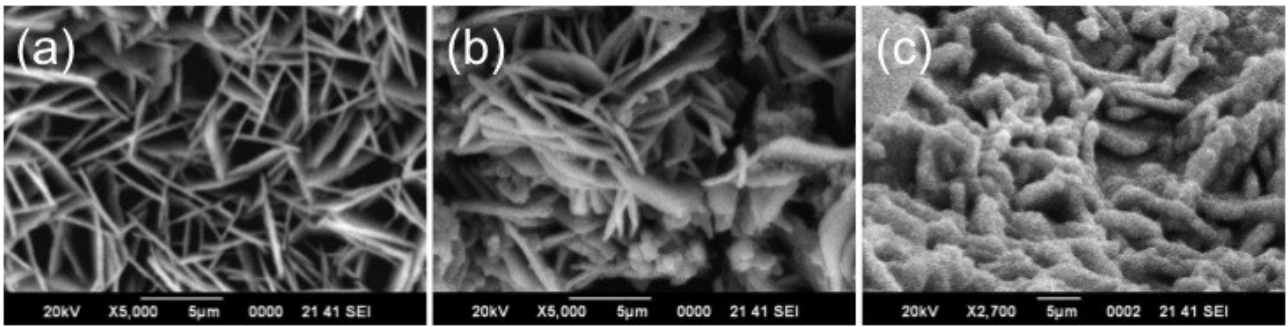

**Figure S4:** Variation of NiCo-hydroxide nanosheet thickness upon number of deposition: (a) Single deposition, (b) 3-times deposition and (c) 10-times deposition.

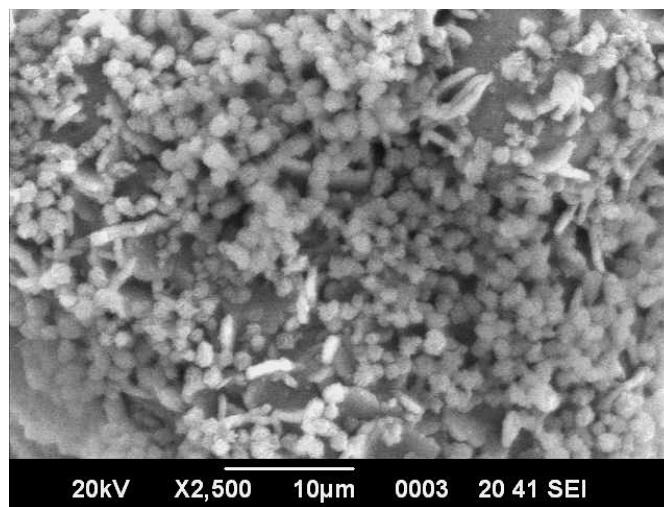

**Figure S5:** NiCo<sub>2</sub>S<sub>4</sub> nanoflake balls deposited on NiCo<sub>2</sub>O<sub>4</sub> nanosheets.

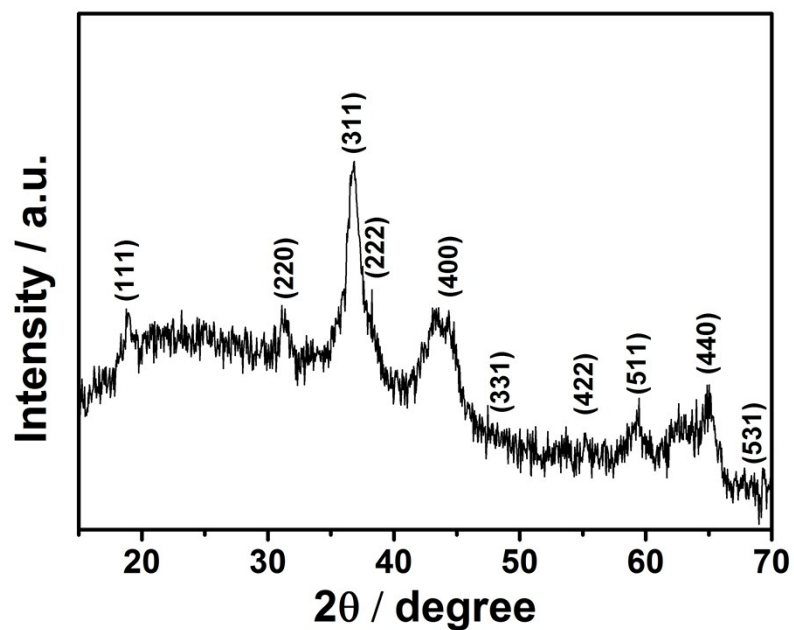

**Figure S6:** XRD pattern of NiCo<sub>2</sub>O<sub>4</sub> nanosheets (JCPDS No. 20-0781) without Ni foam.

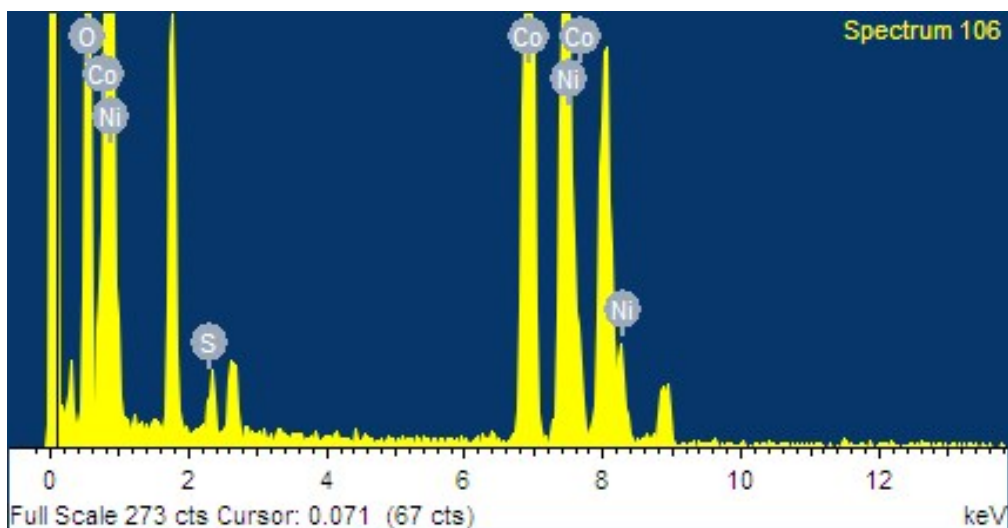

**Figure S7:** Energy dispersive x-ray analysis of NiCo<sub>2</sub>O<sub>4</sub>/NiCo<sub>2</sub>S<sub>4</sub> nano hybrids.

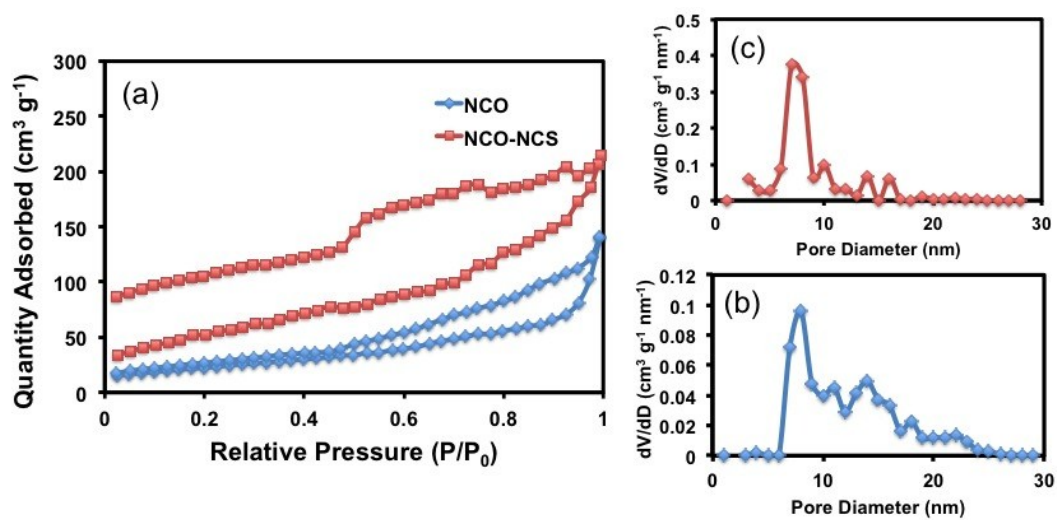

**Figure S8:** (a) N<sub>2</sub> adsorption–desorption isotherm of NCO and NCO-NCS and (b-c) BJH pore size distribution of NCO (b) and NCO-NCS (c).

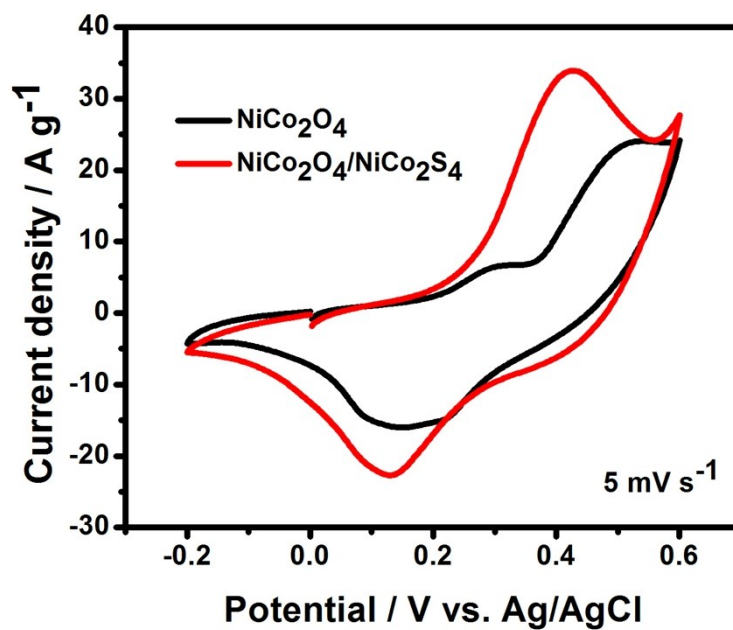

**Figure S9:** CV diagram of NiCo<sub>2</sub>O<sub>4</sub> nanosheets and NiCo<sub>2</sub>O<sub>4</sub>/NiCo<sub>2</sub>S<sub>4</sub> hybrid nanostructures at a scan rate 5 mV s<sup>-1</sup>

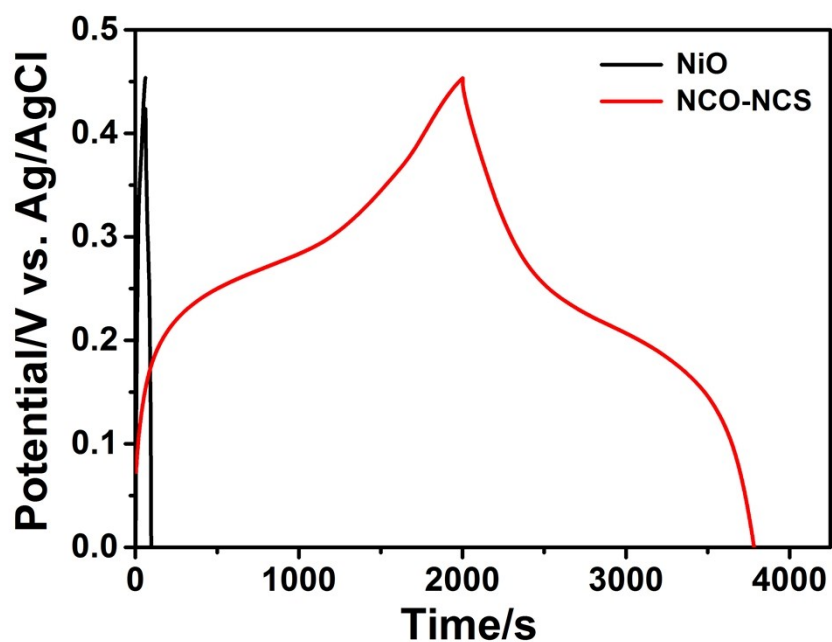

**Figure S10:** Charge-discharge profile of NiO (formed on Ni foam by annealing) and NiCo<sub>2</sub>O<sub>4</sub>/NiCo<sub>2</sub>S<sub>4</sub> hybrid electrode at current density 1.33 mA cm<sup>-2</sup> showing negligible contribution of NiO (Areal capacitance  $C_a = 0.106$  F cm<sup>-2</sup>) in the performance of hybrid nanostructure (Areal capacitance  $C_a = 5.24$  F cm<sup>-2</sup>).

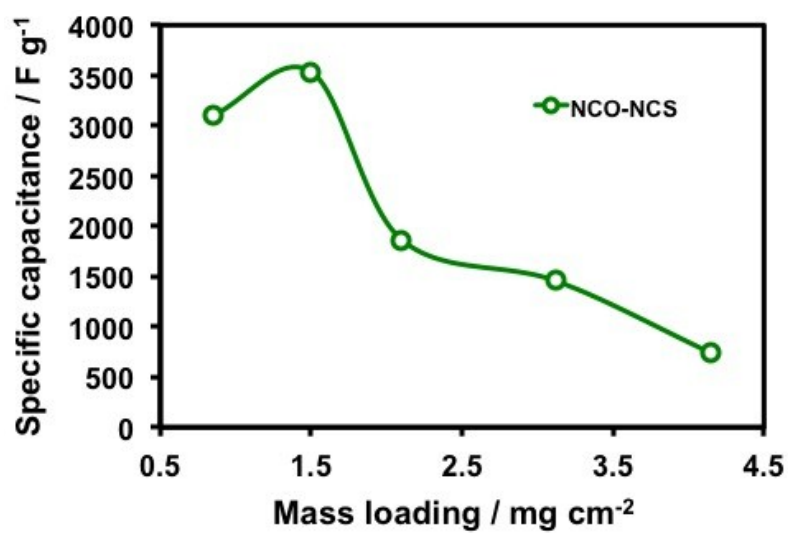

**Figure S11:** Specific capacitance (@ 1 A  $\text{g}^{-1}$ ) as a function of mass loading for  $\text{NiCo}_2\text{O}_4/\text{NiCo}_2\text{S}_4$  hybrid nanostructures on Ni foam.

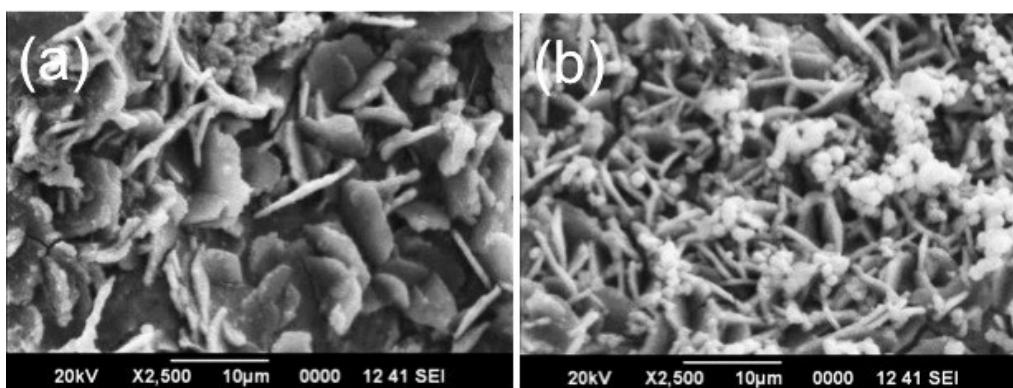

**Figure S12:** SEM images of (a) NCO and (b) NCO-NCS after stability tests of several thousand cycles.

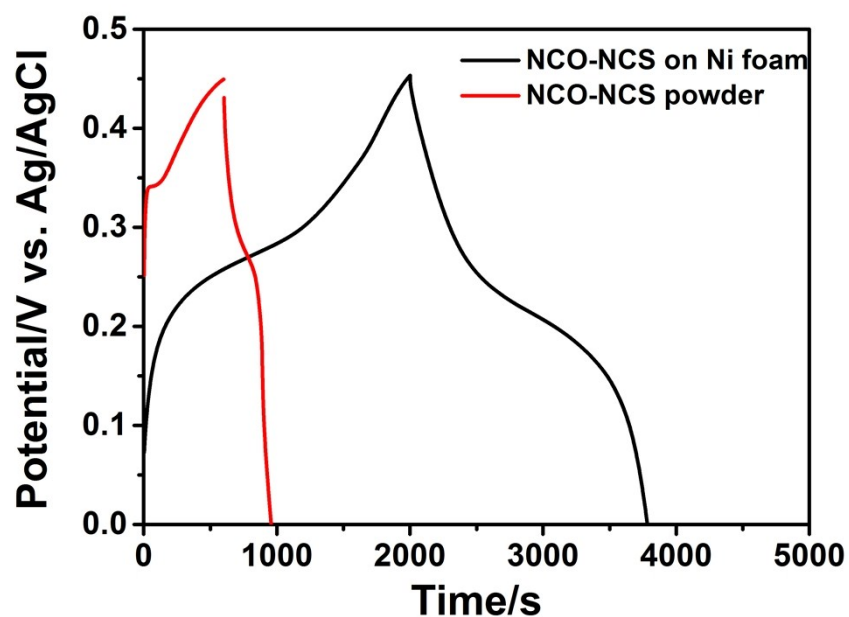

**Figure S13:** Charge-discharge profile comparison of physically mixed  $\text{NiCo}_2\text{O}_4$  and  $\text{NiCo}_2\text{S}_4$  in 3:1 ratio ( $791 \text{ F g}^{-1}$  @  $1 \text{ A g}^{-1}$ ) and directly grown  $\text{NiCo}_2\text{O}_4/\text{NiCo}_2\text{S}_4$  hybrid nanostructure on Ni foam ( $3542 \text{ F g}^{-1}$  @  $0.9 \text{ A g}^{-1}$ ). Physically mixed  $\text{NiCo}_2\text{O}_4$  and  $\text{NiCo}_2\text{S}_4$  powder based electrode was fabricated by mixing 80% of sample with 10% PVDF and 10% C-black in NMP.

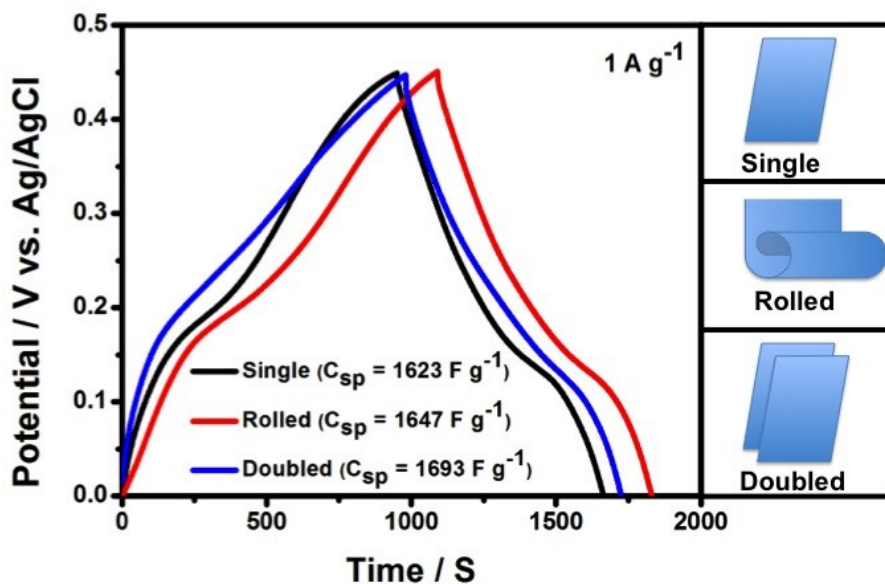

**Figure S14:** Flexibility test of  $\text{NiCo}_2\text{O}_4/\text{NiCo}_2\text{S}_4$  hybrid electrode: Galvanostatic charge-discharge profile of 'single', 'rolled' and 'doubled' experiment at current density  $1 \text{ A g}^{-1}$ .

**Table S1:** Comparison of specific capacitance and capacity retention values of reported NiCo<sub>2</sub>O<sub>4</sub> and NiCo<sub>2</sub>S<sub>4</sub>-based electrodes with the present work.

| Electrode Material                                                                        | Method                             | Specific capacitance (F g <sup>-1</sup> ) | Current density (A g <sup>-1</sup> ) | Capacity retention                                             | Ref.      |
|-------------------------------------------------------------------------------------------|------------------------------------|-------------------------------------------|--------------------------------------|----------------------------------------------------------------|-----------|
| NiCo <sub>2</sub> O <sub>4</sub> nanosheets                                               | Microwave                          | 467                                       | 10                                   | 95% after 5000 cycles @10 A g <sup>-1</sup>                    | 1         |
| NiCo <sub>2</sub> O <sub>4</sub> nanotubes                                                | Electrospinning technique          | 1647<br>1300                              | 1<br>10                              | 93.6% after 3000 cycles @10 A g <sup>-1</sup>                  | 2         |
| Urchin-like NiCo <sub>2</sub> O <sub>4</sub> nanostructures                               | Hydrothermal                       | 1650<br>1348                              | 1<br>15                              | 90.8% after 2000 cycles @8 A g <sup>-1</sup>                   | 3         |
| NiCo <sub>2</sub> O <sub>4</sub> microstructure                                           | Hydrothermal                       | 700                                       | 10                                   | 78.7% after 5000 cycles @10 A g <sup>-1</sup>                  | 4         |
| NiCo <sub>2</sub> O <sub>4</sub> hollow sphere                                            | Solvothermal                       | 1141<br>862                               | 1<br>10                              | 94.7% after 4000 cycles @5 A g <sup>-1</sup>                   | 5         |
| NiCo <sub>2</sub> S <sub>4</sub> hollow spheres                                           | Hydrothermal                       | 1263                                      | 2                                    | 94% after 20000 cycles @10 A g <sup>-1</sup>                   | 6         |
| NiCo <sub>2</sub> S <sub>4</sub> hexagonal plates                                         | Hydrothermal                       | 1085<br>852                               | 0.5<br>10                            | 95.6% after 2000 cycles @10 A g <sup>-1</sup>                  | 7         |
| NiCo <sub>2</sub> S <sub>4</sub> ball-in-ball hollow spheres                              | Solvothermal                       | 1036<br>760                               | 1<br>10                              | 87% after 2000 cycles @5 A g <sup>-1</sup>                     | 8         |
| NiCo <sub>2</sub> O <sub>4</sub> nanoneedle on Ni foam                                    | Hydrothermal                       | 2193<br>1490                              | 1<br>10                              | 72% after 2000 cycles @5 A g <sup>-1</sup>                     | 9         |
| NiCo <sub>2</sub> O <sub>4</sub> multiple hierarchical structures on Ni foam              | Hydrothermal                       | 2623<br>2121                              | 1<br>10                              | 94% after 3000 cycles @10 A g <sup>-1</sup>                    | 10        |
| NiCo <sub>2</sub> O <sub>4</sub> nanowires on C-Frame                                     | Hydrothermal                       | 1696<br>1231                              | 1<br>8                               | 88% after 2000 cycles @5 A g <sup>-1</sup>                     | 11        |
| NiCo <sub>2</sub> O <sub>4</sub> nanosheet on Ni foam                                     | Co-electrodeposition               | 2010<br>1596                              | 2<br>12                              | 94% after 2300 cycles @2 A g <sup>-1</sup>                     | 12        |
| Flower-like NiCo <sub>2</sub> O <sub>4</sub> on graphene foam                             | Electrodeposition                  | 1402<br>1220                              | 1<br>10                              | 76.6% after 5000 cycles @5 A g <sup>-1</sup>                   | 13        |
| NiCo <sub>2</sub> S <sub>4</sub> nanoflakes on Ni foam                                    | Solution method                    | 2732<br>2200                              | 1<br>10                              | 85.2% after 3000 cycles @30 A g <sup>-1</sup>                  | 14        |
| NiCo <sub>2</sub> S <sub>4</sub> nanoflakes on C-cloth                                    | Electrodeposition                  | 1418                                      | 5                                    | 82.2% after 20000 cycles @5 A g <sup>-1</sup>                  | 15        |
| NiCo <sub>2</sub> O <sub>4</sub> @NiCo <sub>2</sub> O <sub>4</sub> nanocactus             | Hydrothermal/<br>Electrodeposition | 1264<br>810                               | 2<br>10                              | 93.4% after 5000 cycles @1 A g <sup>-1</sup>                   | 16        |
| NiCo <sub>2</sub> O <sub>4</sub> -Ppy on C-textile                                        | Hydrothermal/<br>polymerization    | 2244<br>1358                              | 1<br>30                              | 89.5% after 5000 cycles @3 A g <sup>-1</sup>                   | 17        |
| NiCo <sub>2</sub> O <sub>4</sub> @Ppy core-shell nanowires on C-microfiber                | Hydrothermal/<br>Electrodeposition | 2055<br>742                               | 1<br>50                              | 90% after 5000 cycles @4 A g <sup>-1</sup>                     | 18        |
| NiCo <sub>2</sub> O <sub>4</sub> @Ni <sub>3</sub> S <sub>2</sub> core/shell nanothorn     | Hydrothermal/<br>Electrodeposition | 1716<br>1104                              | 1<br>20                              | 83.7% after 2000 cycles @4 A g <sup>-1</sup>                   | 19        |
| NiCo <sub>2</sub> O <sub>4</sub> @NiCo <sub>2</sub> O <sub>4</sub> core-shell nanoarray   | Hydrothermal                       | 1917<br>1645                              | 1<br>10                              | More than initial value after 2000 cycles @5 A g <sup>-1</sup> | 20        |
| NiCo <sub>2</sub> S <sub>4</sub> @MnO <sub>2</sub> nanoheterostructure                    | Hydrothermal                       | 1338<br>800                               | 2<br>10                              | 82% after 2000 cycles @20 A g <sup>-1</sup>                    | 21        |
| NiCo <sub>2</sub> O <sub>4</sub> nanosheets on Ni foam                                    | Solution method                    | 3184                                      | 1.2                                  | 69% after 2000 cycles @6 A g <sup>-1</sup>                     | This work |
|                                                                                           |                                    | 1363                                      | 12                                   |                                                                |           |
| NiCo <sub>2</sub> O <sub>4</sub> /NiCo <sub>2</sub> S <sub>4</sub> nanohybrids on Ni-foam |                                    | 3542<br>2767                              | 0.9<br>9                             |                                                                |           |



## References

1. A. K. Mondal, D. W. Su, S. Q. Chen, K. Kretschmer, X. Q. Xie, H. J. Ahn and G. X. Wang, *ChemPhysChem*. 2015, **16**, 169-175.
2. L. Li, S. Peng, Y. Cheah, P. Teh, J. Wang, G. Wee, Y. Ko, C. Wong and M. Srinivasan, *Chem. Eur. J*, 2013, **19**, 5892-5898.
3. Q. Wang, B. Liu, X. Wang, S. Ran, L. Wang, D. Chen and G. Shen, *J Mater Chem*, 2012, **22**, 21647–21653.
4. N. Xiang, Y. Ni and X. Ma, *Chem. Asian. J*. 2015, **10**, 1972-1978.
5. L. Shen, L. Yu, X. Y. Yu, X. Zhang and X. W. Lou, *Angew. Chem. Int. Ed*. 2015, **54**, 1868-1872.
6. C. Xia and H. N. Alshareef, *Chem. Mater*. 2015, **27**, 4661-4668.
7. J. Yang, W. Guo, D. Li, Q. Qin, J. Zhang, C. Wei, H. Fan, L. Wu and W. Zheng, *Electrochim Acta* 2014, **144**, 16-21.
8. L. Shen, L. Yu, H. B. Wu, X.-Y. Yu, X. Zhang and X. W. D. Lou, *Nat. Commun.*, 2015, **6**, 6694.
9. J. Wu, R. Mi, S. Li, P. Guo, J. Mei, H. Liu, W.-M. Lau and L.-M. Liu, *RSC Adv*. 2015, **5**, 25304–25311.
10. Q. Zhou, J. Xing, Y. Gao, X. Lv, Y. He, Z. Guo and Y. Li, *ACS Appl. Mater. Interf.* 2014, **6**, 11394-11402.
11. W. Xiong, Y. Gao, X. Wu, X. Hu, D. Lan, Y. Chen, X. Pu, Y. Zeng, J. Su and Z. Zhu, *ACS Appl. Mater. Interf.* 2014, **6**, 19416-19423.
12. C. Yuan, J. Li, L. Hou, X. Zhang, L. Shen and X. W. D. Lou, *Adv Funct Mater* 2012, **22**, 4592-4597.
13. C. Zhang, T. Kuila, N. H. Kim, S. H. Lee and J. H. Lee, *Carbon*, 2015, **89**, 328-339.
14. J.-G. Wang, R. Zhou, D. Jin, K. Xie and B. Wei, *Energy Storage Mater*. 2016, **2**, 1-7.

15. W. Chen, C. Xia and H. N. Alshareef, *ACS Nano*, 2014, **8**, 9531-9541.
16. J. Cheng, Y. Lu, K. Qiu, H. Yan, J. Xu, L. Han, X. Liu, J. Luo, J. K. Kim and Y. Luo, *Sci. Rep.* 2015, **5**, 12099.
17. D. Kong, W. Ren, C. Cheng, Y. Wang, Z. Huang and H. Y. Yang, *ACS Appl. Mater. Interf.* 2015, **7**, 21334-21346.
18. W. Xiong, X. Hu, X. Wu, Y. Zeng, B. Wang, G. He and Z. Zhu, *J Mater Chem A* 2015, **3**, 17209–17216.
19. J. Wang, S. Wang, Z. Huang and Y. Yu, *J Mater Chem A* 2014, **2**, 17595-176701.
20. W. Zhou, D. Kong, X. Jia, C. Ding, C. Cheng and G. Wen, *J Mater Chem A* 2014, **2**, 6310–6315.
21. J. Yang, M. Ma, C. Sun, Y. Zhang, W. Huang and X. Dong, *J Mater Chem A* 2015, **3**, 1258-1264.
